# Supplementary material for: Integrated Horticultural Practices for Improving Apple Supply Chain Sustainability: A Case Study in the North China Plain
Source: MDPI journal article supplement (doi:10.3390/agronomy11101975), 2021-09-30
Supplement: s1 [file s1]

**Table S1.** Formulas and parameters of N flow in apple supply chain

| Process            | Items               | Formula                         | Parameter meaning                                                                                                                                                                       | Data source                                                                                    |
|--------------------|---------------------|---------------------------------|-----------------------------------------------------------------------------------------------------------------------------------------------------------------------------------------|------------------------------------------------------------------------------------------------|
| Production process | N <sub>input</sub>  | Chemical fertilizer ( $I_1$ )   | $I_1 = F_1 * C_1$<br>$F_1$ : Chemical fertilizer application; $C_1$ : N content in chemical fertilizer                                                                                  | Survey data, calculation                                                                       |
|                    |                     | Manure ( $I_2$ )                | $I_2 = F_2 * C_2$<br>$F_2$ : Manure application; $C_2$ : N content in manure                                                                                                            | Survey data, calculation                                                                       |
|                    |                     | Biological fixed ( $I_3$ )      | $I_3$<br>$I_3$ =Amount of farmland biological N fixation in Hebei province/farmland area in Hebei province                                                                              | Xiang, R. et al, 2013 <sup>[32]</sup> ; Department of Natural Resource of Hebei Province, 2018 |
|                    |                     | Deposition ( $I_4$ )            | $I_4$<br>$I_4$ =25.8 kg(N)·hm <sup>-2</sup> ·a <sup>-1</sup>                                                                                                                            | Institute of Geographic Sciences and Natural Resources Research, CAS, 2016                     |
|                    |                     | Irrigation ( $I_5$ )            | $I_5 = S * C_3$<br>$S$ : Average irrigation capacity, 4705.70 m <sup>3</sup> ·hm <sup>-2</sup> ·a <sup>-1</sup> ; $C_3$ : N from irrigation water, 3.78 mg·L <sup>-1</sup>              | Cao, C. 2014; Chen, Y. 2013 <sup>[33,34]</sup>                                                 |
|                    | N <sub>output</sub> | Apples ( $O_1$ )                | $O_1 = Y' * C_4$<br>$C_4$<br>$Y'$ : Apple yield<br>$C_4$ : N content of apple fruit, 5.37 g·kg <sup>-1</sup>                                                                            | Survey data<br>Fan, H. et al, 2008 <sup>[35]</sup>                                             |
|                    |                     | Trees ( $O_2$ )                 | $O_2 = 248.95 * C_5$<br>$O_2$ : N accumulation of apple tree, and the value of N accumulation of one tree is 248.95 g; $C_5$ : Density, unit: plant·hm <sup>-2</sup>                    | Fan, H. et al, 2008 <sup>[35]</sup>                                                            |
|                    |                     | NH <sub>3</sub> ( $E_1$ )       | $E_1$<br>$E_1$ : The percentage of NH <sub>3</sub> volatilized N loss in the amount of N applied; 50% Chemical fertilizer +50% manure: 3.48%, 75% Chemical fertilizer +25% manure: 4.1% | Ge, S. 2011 <sup>[36]</sup>                                                                    |
|                    | N <sub>loss</sub>   | N <sub>2</sub> O ( $E_2$ )      | $E_2$<br>$E_2$ : The percentage of denitrification loss in the amount of N applied, 0.81%                                                                                               | Ge, S. 2011 <sup>[36]</sup>                                                                    |
|                    |                     | Others ( $E_3$ )                | $E_3$<br>$E_3$ : Other N loss, 47.49%                                                                                                                                                   | Ge, S. 2011 <sup>[36]</sup>                                                                    |
|                    |                     | Residue ( $E_4$ )               | $E_4$<br>$E_4 = I_1 - O_1 - O_2 - E_1 - E_2 - E_3$                                                                                                                                      |                                                                                                |
| Sales process      | N <sub>input</sub>  | Apple ( $O_1$ )                 | Same as above                                                                                                                                                                           |                                                                                                |
|                    | N <sub>output</sub> | Retail ( $O_3$ )                | $O_3 = (O_1 - E_5) * 30\%$<br>$O_3$ : The N content of retail apples, accounting for 30% of apple sales                                                                                 | Survey data, calculation                                                                       |
|                    |                     | Acquisition ( $O_4$ )           | $O_4 = (O_1 - E_5) * 50\%$<br>$O_4$ : The N content of acquisition apples, accounting for 50% of apple sales                                                                            | Survey data, calculation                                                                       |
|                    |                     | Picking garden ( $O_5$ )        | $O_5 = (O_1 - E_5) * 10\%$<br>$O_5$ : The N content of picking garden apples, accounting for 10% of apple sales                                                                         | Survey data, calculation                                                                       |
|                    |                     | Others ( $O_6$ )                | $O_6 = (O_1 - E_5) * 5\%$<br>$O_6$ : The N content of apples sold by other ways, accounting for 5% of apple sales                                                                       | Survey data, calculation                                                                       |
|                    | N <sub>loss</sub>   | Non-commerical fruits ( $E_5$ ) | $E_5 = O_1 * R$<br>$C_4$ : N content of apple fruit, 5.37 g·kg <sup>-1</sup> ; $R$ : Bad fruit rate, 5%                                                                                 | Survey data, calculation                                                                       |

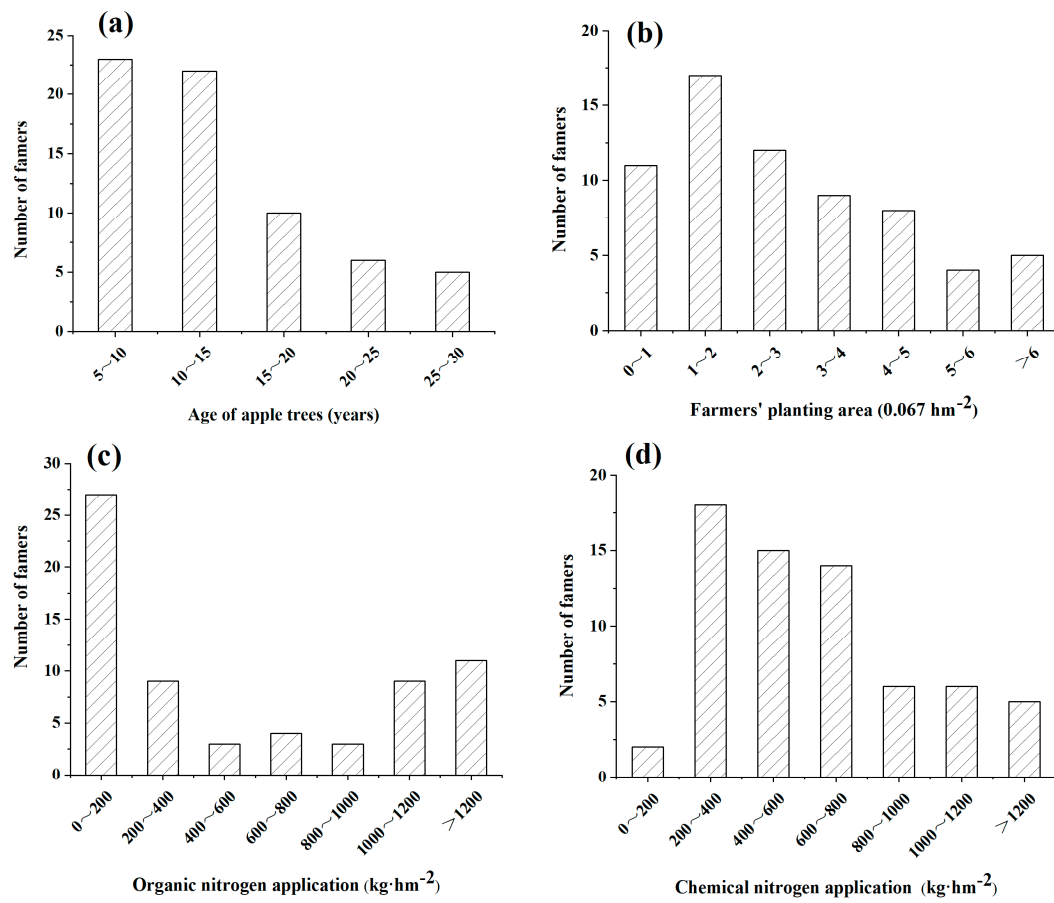

**Figure S1.** Distribution of basic characteristics of apple producers in QuZhou. (a) Age of apple trees; (b) Farmers' planting areas; (c) The amount of organic nitrogen used by smallholders; (d) Nitrogen application rate of chemical fertilizers to smallholders.
